# Supplementary material
Source: publisher figshare collection journal article supplement (https://frontiersin.figshare.com/ndownloader/files/29170842)
Supplement: Supplementary file 1 [file 29170842]

**Supplementary Table 1** Primer sequences for RT-qPCR

| Genes | Primer sequences |
| --- | --- |
| LINC00284 | F: CCAGGGGATAAAACCCGCTT |
| R: TAAGCACCAAGTCACGCTGT |
| miR-30d-5p | F: GCCTGTAAACATCCCCGAC |
| R: GTGCGTGTCGTGGAGTCG |
| U6 | F: CTCGCTTCGGCAGCACA |
| R: AACGCTTCACGAATTTGCGT |
| GAPDH | F: GAAGGTGAAGGTCGGAGTC |
| R: GAAGATGGTGATGGGATTC |

Note: RT-qPCR, reverse transcription-quantitative polymerase chain reaction; F, forward; R, reverse; LINC00284, long intergenic non-protein coding RNA 00284; miR-30d-5p, microRNA-30d-5p; GAPDH, glyceraldehyde-3-phosphate dehydrogenase.
